# Supplementary material
Source: publisher figshare collection journal article supplement (https://acs.figshare.com/ndownloader/files/20805834)
Supplement: Supplementary file 1 [file 20805834]

## DEVELOPING CYCLIC OPIOID ANALOGUES: FLUORESCENTLY LABELED BIOCONJUGATES OF BIPHALIN

Azzurra Stefanucci,<sup>1</sup> Marilisa Pia Dimmito,<sup>1</sup> Gabriela Molnar,<sup>2</sup> John M. Streicher,<sup>2</sup> Ettore Novellino,<sup>3</sup> Gokhan Zengin,<sup>4</sup> Adriano Mollica<sup>1,\*</sup>

<sup>1</sup> Dipartimento di Farmacia, Università di Chieti-Pescara “G. d’Annunzio”, Via dei Vestini 31, 66100 Chieti, Italy.

<sup>2</sup> Department of Pharmacology, College of Medicine, University of Arizona, Tucson, AZ USA.

<sup>3</sup> Dipartimento di Farmacia, Università di Napoli “Federico II”, Via D. Montesano 49, 80131 Naples, Italy.

<sup>4</sup> Department of Biology, Science Faculty, Selcuk University, Konya, Turkey.

Corresponding author: a.mollica; a.mollica@unich.it

| TABLE OF CONTENTS                                                           |       |
|-----------------------------------------------------------------------------|-------|
| Synthesis of unknown key intermediates and final compounds characterization | S2,S3 |
| ESI-LRMS of compounds <b>1C</b> , <b>2C</b> and <b>1D</b>                   | S4-S6 |
| RP-HPLC analytical traces of compounds <b>1C</b> , <b>2C</b> and <b>1D</b>  | S7    |
| References                                                                  | S8    |

## Synthesis of unknown key intermediates and final compounds characterization

N-(2-(3,4-dibromo-2,5-dioxo-2,5-dihydro-1H-pyrrol-1-yl)ethyl)-5-(dimethylamino)naphthalene-1-sulfonamide (**1**): Commercially available dansylchloride was functionalized with *tert*-Butyl *N*-(2-aminoethyl)carbamate following the procedure described by Youziel *et al.*<sup>1</sup> The *N*-Boc protected compound has been already reported in literature and characterized. This intermediate was deprotected with TFA:DCM = 1:1 at r.t. for 1h, then the solvent was removed in rotary evaporator washing with DCM repetitively and dried in high vacuum. The crude peptide was used as such for the following reaction without further purification. 3,4-dibromofuran-2,5-dione was dissolved in AcOH at r.t. then the intermediate TFA salt was added and the system was allowed to reflux at around 110°C for 9h. At r.t. a green-yellow solid precipitate was formed; the liquid was decanted and the solid was dried in high vacuum to yield the desired product **1** in 98% yield after precipitation, pure on TLC (AcOEt:*n*-hexane = 1:1; *R<sub>f</sub>* = 0.6). ESI-LRMS calc. for C<sub>18</sub>H<sub>17</sub>Br<sub>2</sub>N<sub>3</sub>O<sub>4</sub>S: 528.9 [M]; found: 529.2 [M+H]<sup>+</sup>; <sup>1</sup>H NMR (DMSO-*d*<sub>6</sub>) δ: 8.42 (d, 1H, *J* = 8.7 Hz, H-4 aromatic dansyl moiety), 8.16-8.13 (m, 2H, NH and H-6 aromatic dansyl moiety), 8.02 (d, 1H, *J* = 7.5 Hz, H-3 aromatic dansyl moiety), 7.61-7.51 (m, 2H, H-5 and H-2 aromatic dansyl moiety), 7.24 (d, 1H, *J* = 7.5 Hz, H-1 aromatic dansyl moiety), 3.43 (t, 2H, CH<sub>2</sub> aliphatic chain), 3.01 (q, 2H, *J* = 6 Hz, NH-CH<sub>2</sub> aliphatic chain), 2.82 (s, 6H, 2\*CH<sub>3</sub>). <sup>13</sup>C NMR (300 MHz) δ: 164.3, 150.6, 142.8, 133.7, 128.4, 127.3, 125.8, 124.9, 123.4, 119.2, 117.3, 47.3, 46.8, 37.1.

3-(3,4-dibromo-2,5-dioxo-2,5-dihydro-1H-pyrrol-1-yl)-N-(4-methyl-2-oxo-2H-chromen-7-yl)propanamide (**2**): Commercially available 7-Amino-4-methylcoumarin was reacted with Boc-β-Ala-OH following the procedure reported by Heltweg *et al.*<sup>2</sup> to obtain an intermediate compound pure on silica gel TLC plate (AcOEt 100%, *R<sub>f</sub>* = 0.8), in 63% yield after reaction work-up. This intermediate was deprotected with TFA:DCM = 1:1 at r.t. for 1h, then the solvent was removed in rotary evaporator washing with DCM repetitively and dried in high vacuum. The intermediate was used as such for the following reaction without further purification. 3,4-dibromofuran-2,5-dione was dissolved in AcOH at r.t. then the intermediate TFA salt was added and the system was allowed to reflux at around 110°C for 9h. At r.t. a yellow solid precipitate was formed; the liquid was decanted and the solid was dried in high vacuum to yield a crude intermediate product, which was purified on silica gel column chromatography (eluent: 100% AcOEt) to give compound **2** in 40% yield after isolation. TLC: AcOEt 100%; *R<sub>f</sub>* = 0.6. ESI-LRMS calc. for C<sub>17</sub>H<sub>12</sub>Br<sub>2</sub>N<sub>2</sub>O<sub>5</sub>: 481.9 [M]; found: 482.5 [M+H]<sup>+</sup>; <sup>1</sup>H NMR (DMSO-*d*<sub>6</sub>) δ: 7.89 (d, 1H, *J* = 8.7 Hz, H-4 aromatic coumarin moiety), 7.72 (d, 1H, H-2 aromatic coumarin moiety), 7.44-7.40 (m, 2H, H-3 + NH), 6.45 (s, 1H, H-1 aromatic coumarin moiety), 3.40, 3.26 (t, 4H, 2\*CH<sub>2</sub> aliphatic chain under DMSO), 2.44 (s, 3H, CH<sub>3</sub>). <sup>13</sup>C NMR (300 MHz) δ: 173.3, 164.1, 160.3, 154.6, 152.5, 138.9, 126.5, 124.7, 118.1, 115.4, 112.9, 111.1, 40.8, 32.1, 19.6.

3,4-dibromo-1-(4-methyl-2-oxo-2H-chromen-7-yl)-1H-pyrrole-2,5-dione (**3**): 3,4-dibromofuran-2,5-dione was dissolved in AcOH at r.t. then the 7-Amino-4-methylcoumarin was added and the system was allowed to reflux at around 110°C for 9h. At r.t. a yellow solid precipitate was formed; the liquid was decanted and the solid was dried in high vacuum to give a yellow powder product **3**, pure on TLC plate (100% AcOEt, *R<sub>f</sub>* = 0.8), with 71% yield after reaction work-up. ESI-LRMS calc. for C<sub>14</sub>H<sub>7</sub>Br<sub>2</sub>NO<sub>4</sub>: 410.8 [M]; found: 411.5 [M+H]<sup>+</sup>;

$^1\text{H}$  NMR ( $\text{CDCl}_3$ )  $\delta$ : 7.71 (d, 1H,  $J = 9$  Hz, H-2 aromatic coumarin moiety), 7.44-7.35 (m, 2H, H-3 + H-4 aromatic coumarin moiety), 6.34 (s, 1H, H-1 aromatic coumarin moiety), 2.46 (s, 3H,  $\text{CH}_3$ ).  $^{13}\text{C}$  NMR (300 MHz)  $\delta$ : 163.4, 159.8, 153.2, 153.1, 134.5, 130.3, 126.4, 122.9, 119.7, 115.3, 114.8, 110.1, 18.5.

**Compound 1D**: The desired product has been obtained in good overall yield (71%) following the procedure previously reported by us;<sup>3</sup> Rt (HPLC) = 15.60 min (284 nm).  $^1\text{H}$  NMR ( $\text{DMSO-d}_6$ )  $\delta$ : 1.88 (s, 6H,  $2^*\text{CH}_3$  aromatic dansyl moiety), 2.34-2.65 (4H, m, Tyr  $^{\beta}\text{CH}_2$ ; 4H, m, Phe  $^{\beta}\text{CH}_2$ ), 2.91 (4H, d, D-Cys  $^{\beta}\text{CH}_2$ ), 3.03 (4H, m, Gly  $^{\alpha}\text{CH}_2$ ), 3.08 (q, 2H,  $J = 6$  Hz,  $\text{NH-CH}_2$  aliphatic chain), 3.48 (t, 2H,  $\text{CH}_2$  aliphatic chain), 3.91-4.11 (2H, t, Tyr  $^{\alpha}\text{CH}$ ; 2H, t, Phe  $^{\alpha}\text{CH}$ ), 4.71-4.81 (2H, m, D-Cys  $^{\alpha}\text{CH}$ ), 6.61 (4H, dd, Tyr Ar), 7.01 (4H, dd, Tyr Ar), 7.09-7.26 (10H, m, Phe Ar; 3H, m, H-5, H-2, H-1 aromatic dansyl moiety), 8.04-8.21 (6H, d, Tyr  $\text{NH}_3^+$ ; 2H, d, D-Cys; 3H, m, NH and H-6, H-3 aromatic dansyl moiety), 8.68-8.82 (2H, d, Phe NH; 2H, t, Gly NH; d, 1H, H-1 aromatic dansyl moiety), 9.33 (2H, s, OH), 10.31 (2H, s, NH-NH). ESI-LRMS: Calcd exact mass without TFA for  $\text{C}_{64}\text{H}_{71}\text{N}_{13}\text{O}_{14}\text{S}_3$  m/z: 1341.4 [M]; found 1342.5 [M+H]<sup>+</sup>.

**Compound 1C**: The desired product has been obtained in good overall yield (61%) following the procedure previously reported by us;<sup>3</sup> Rt (HPLC) = 15.85 min (284 nm).  $^1\text{H}$  NMR ( $\text{DMSO-d}_6$ )  $\delta$ : 1.21 (s, 3H,  $\text{CH}_3$  coumarin moiety), 2.34-2.65 (4H, m, Tyr  $^{\beta}\text{CH}_2$ ; 4H, m, Phe  $^{\beta}\text{CH}_2$ ), 2.97 (4H, d, D-Cys  $^{\beta}\text{CH}_2$ ), 3.01 (4H, m, Gly  $^{\alpha}\text{CH}_2$ ), 3.91-4.11 (2H, t, Tyr  $^{\alpha}\text{CH}$ ; 2H, t, Phe  $^{\alpha}\text{CH}$ ), 4.71-4.81 (2H, m, D-Cys  $^{\alpha}\text{CH}$ ), 6.44 (s, 1H, H-1 aromatic coumarin moiety), 6.61 (4H, dd, Tyr Ar), 7.01 (4H, dd, Tyr Ar), 7.09-7.26 (10H, m, Phe Ar), 7.38-7.40 (m, 2H, H-3 + H-4 aromatic coumarin moiety), 7.82 (d, 1H,  $J = 8.9$  Hz, H-2 aromatic coumarin moiety), 8.01-8.17 (6H, d, Tyr  $\text{NH}_3^+$ ; 2H, d, D-Cys NH), 8.68-8.82 (2H, d, Phe NH; 2H, t, Gly NH), 9.29 (2H, s, OH), 10.16 (2H, s, NH-NH). ESI-LRMS: Calcd exact mass without TFA for  $\text{C}_{60}\text{H}_{61}\text{N}_{11}\text{O}_{14}\text{S}_2$  m/z: 1223.3 [M]; found 1224.7 [M+H]<sup>+</sup>.

**Compound 2C**: The desired product has been obtained in good overall yield (58%) following the procedure previously reported by us;<sup>3</sup> Rt (HPLC) = 15.90 min (284 nm).  $^1\text{H}$  NMR ( $\text{DMSO-d}_6$ )  $\delta$ : 1.21 (s, 3H,  $\text{CH}_3$  coumarin moiety), 2.34-2.65 (4H, m, Tyr  $^{\beta}\text{CH}_2$ ; 4H, m, Phe  $^{\beta}\text{CH}_2$ ), 2.42-2.75 (4H, m,  $^{\beta}\text{Ala } 2^*\text{CH}_2$ ), 2.97 (4H, d, D-Cys  $^{\beta}\text{CH}_2$ ), 3.01 (4H, m, Gly  $^{\alpha}\text{CH}_2$ ), 3.91-4.11 (2H, t, Tyr  $^{\alpha}\text{CH}$ ; 2H, t, Phe  $^{\alpha}\text{CH}$ ), 4.71-4.81 (2H, m, D-Cys  $^{\alpha}\text{CH}$ ), 6.44 (s, 1H, H-1 aromatic coumarin moiety), 6.61 (4H, dd, Tyr Ar), 7.01 (4H, dd, Tyr Ar), 7.09-7.26 (10H, m, Phe Ar), 7.38-7.40 (m, 2H, H-3 + H-4 aromatic coumarin moiety), 7.82 (d, 1H,  $J = 8.9$  Hz, H-2 aromatic coumarin moiety), 8.01-8.17 (6H, d, Tyr  $\text{NH}_3^+$ ; 2H, d, D-Cys NH; 1H, s, NH aromatic coumarin moiety), 8.66-8.82 (2H, d, Phe NH; 2H, t, Gly NH), 9.35 (2H, s, OH), 10.21 (2H, s, NH-NH). ESI-LRMS: Calcd exact mass without TFA for  $\text{C}_{63}\text{H}_{66}\text{N}_{12}\text{O}_{15}\text{S}_2$  m/z: 1294.4 [M]; found 1228.4, 1250.5 (fragmentation occurs).<sup>4</sup>

# ESI-LRMS of compound 1D

LCQ Instrument Control 14 Jan 2019 07:50 AM

S#: 4837 IT: 40.52 ST: 1.84 #A: 10

NL: 2.05e+005

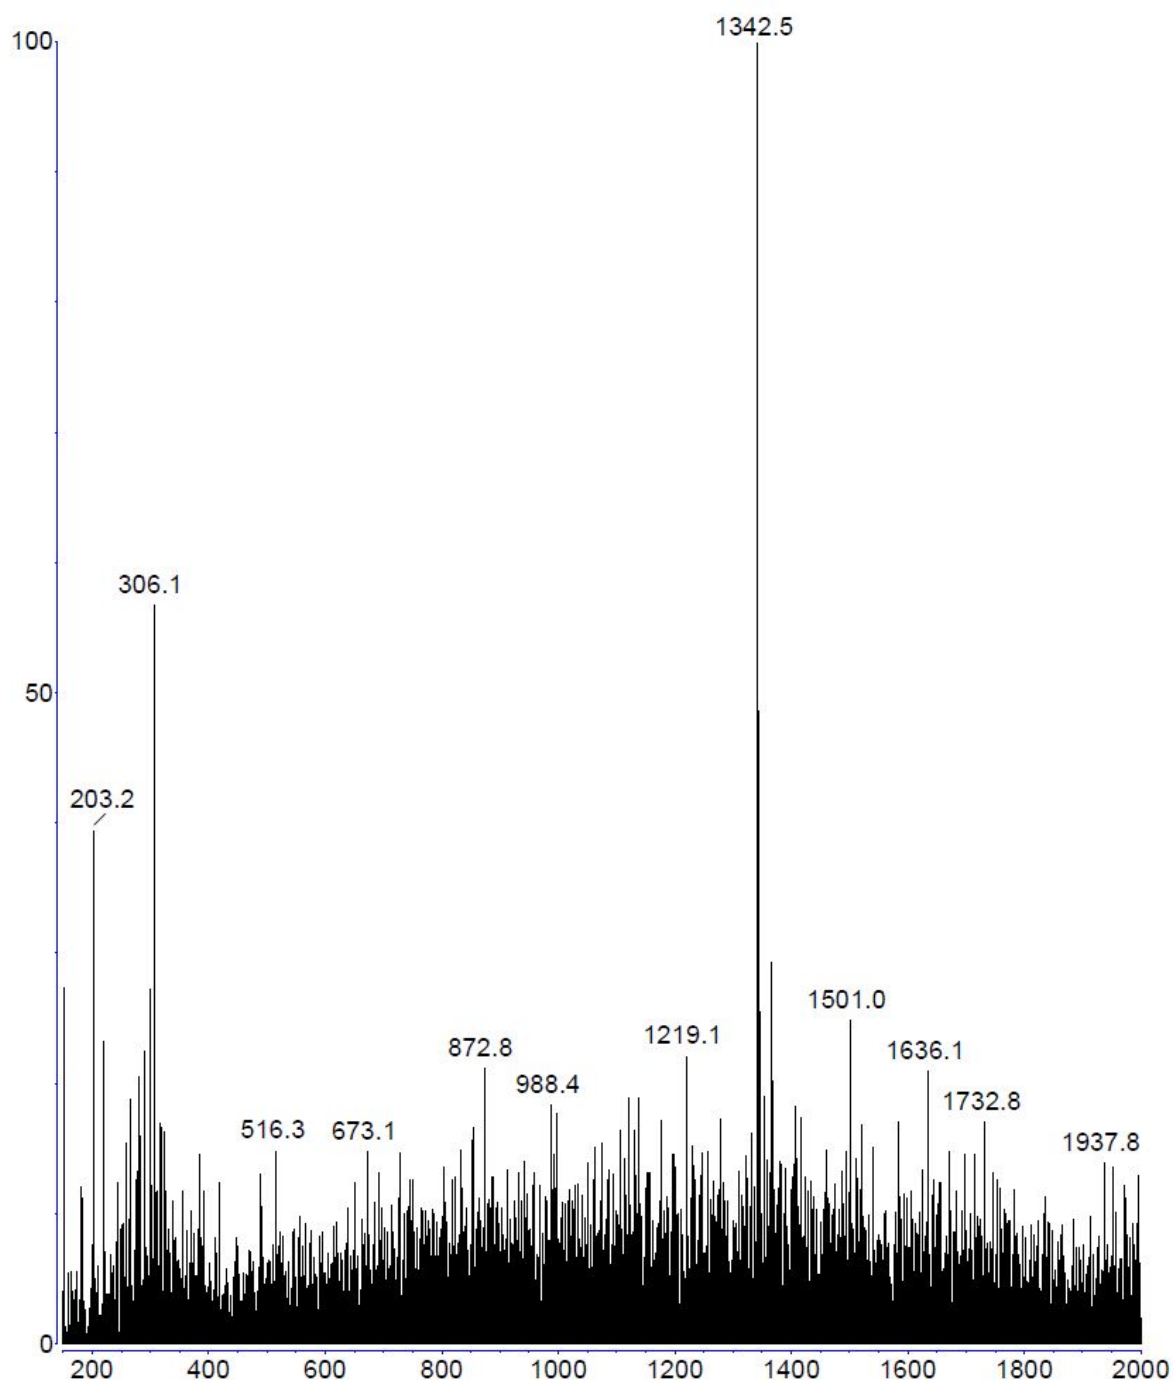

# ESI-LRMS of compound 1C

LCQ Instrument Control 15 Nov 2017 06:19 AM

S#: 1052 IT: 1.06 ST: 1.67

NL: 2.65e+007

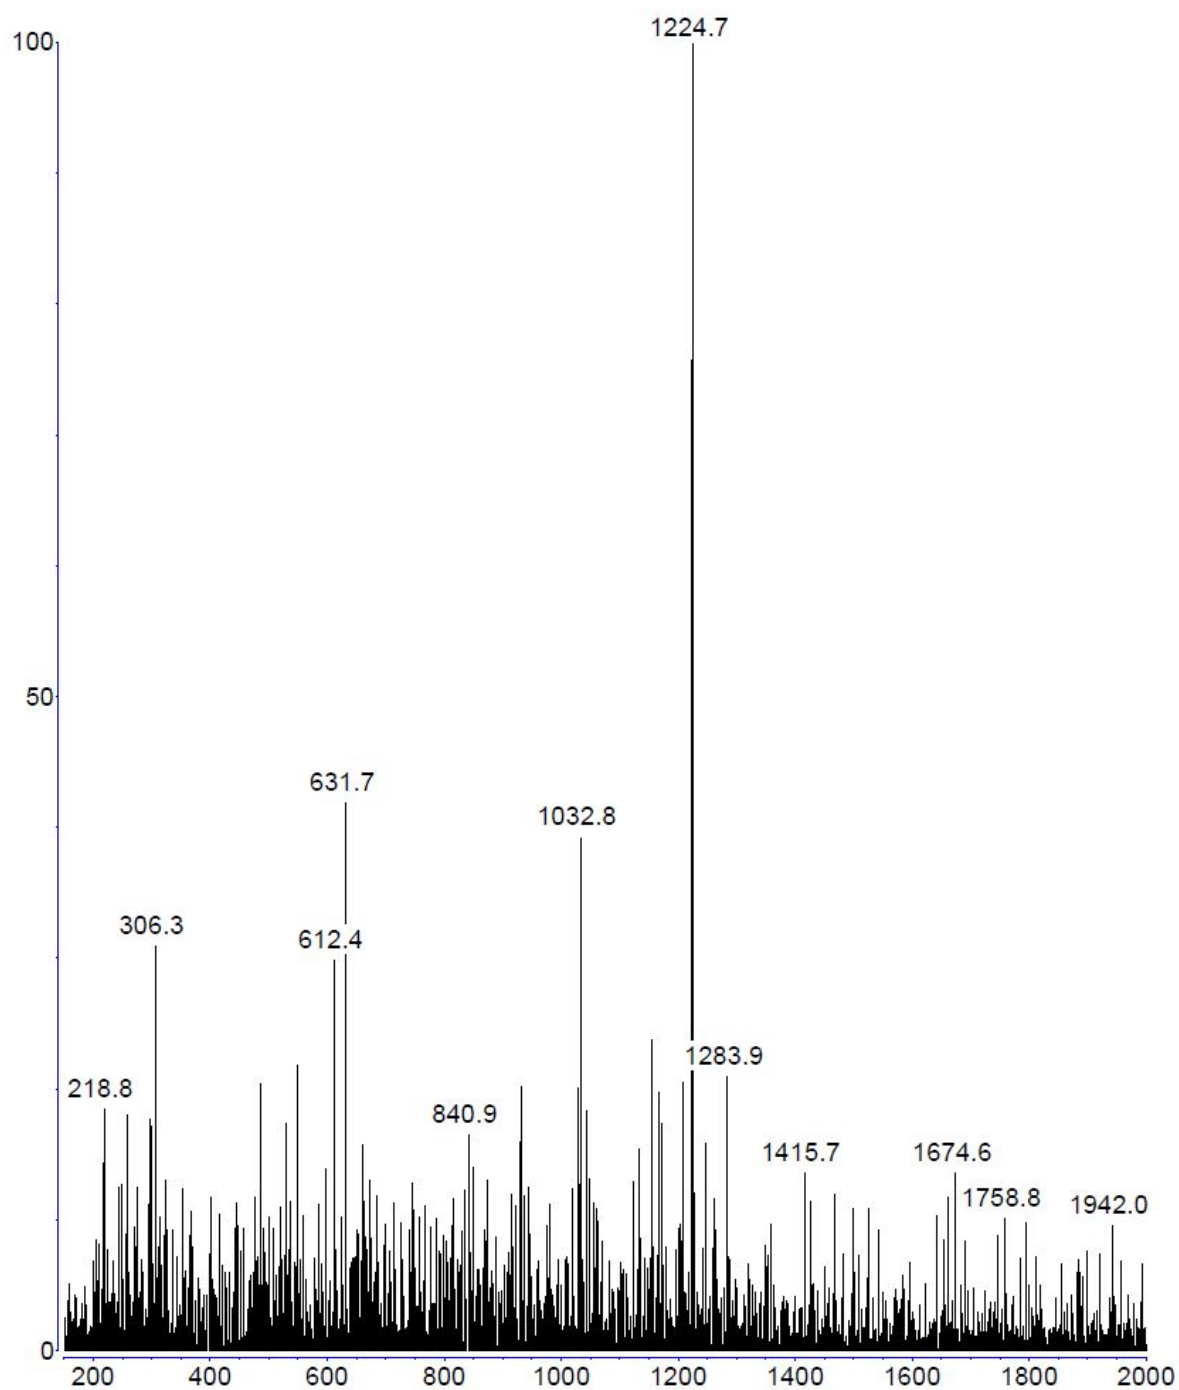

# ESI-LRMS of compound 2C

LCQ Instrument Control 06 Mar 2019 05:06 AM

S#: 2405 IT: 5.98 ST: 1.74 #A: 10

NL: 7.77e+006

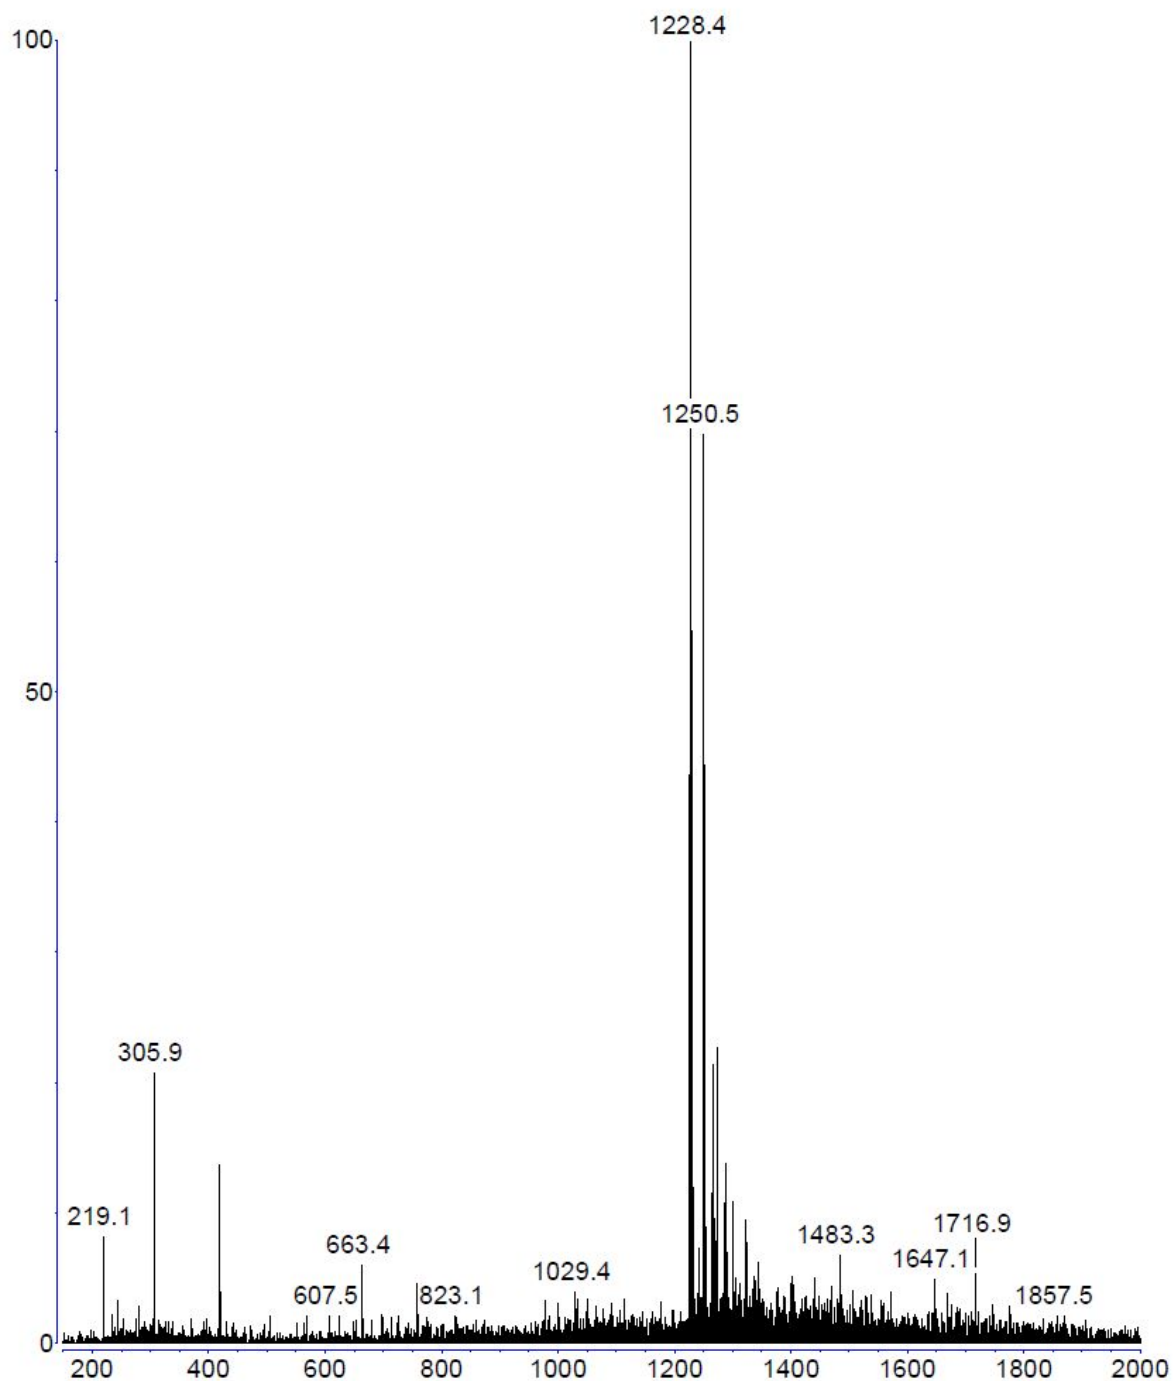

# RP-HPLC analytical traces for compounds **1D**, **1C**, **2C** at 284 nm

## **1D**

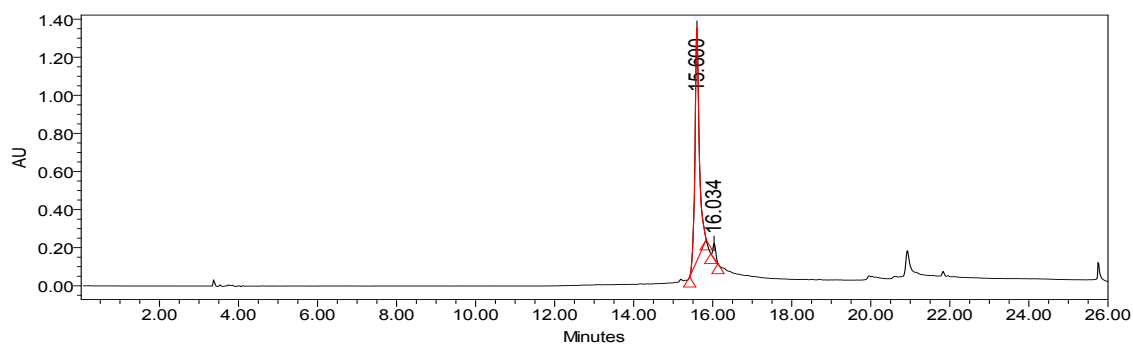

|   | Retention Time | Area    | % Area | Height  |
|---|----------------|---------|--------|---------|
| 1 | 15.600         | 9301414 | 96.04  | 1210912 |
| 2 | 16.034         | 383241  | 3.96   | 77032   |

## **1C**

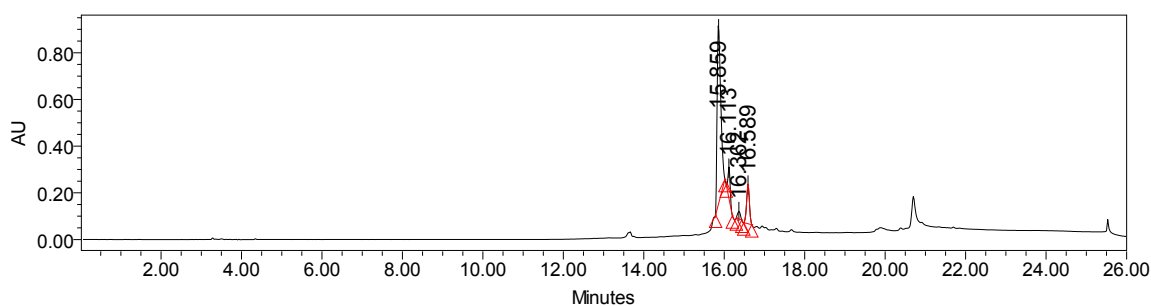

|   | Retention Time | Area    | % Area | Height |
|---|----------------|---------|--------|--------|
| 3 | 16.587         | 53057   | 3.97   | 11794  |
| 2 | 16.364         | 20039   | 1.50   | 4326   |
| 1 | 15.859         | 1263392 | 94.53  | 151699 |

## **2C**

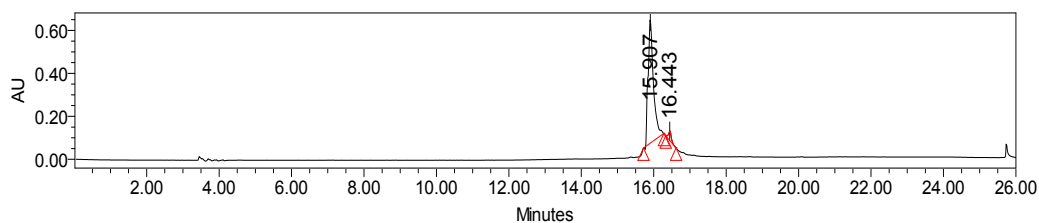

|   | Name | Retention Time | Area    | % Area | Height |
|---|------|----------------|---------|--------|--------|
| 2 |      | 16.443         | 242800  | 3.95   | 44093  |
| 1 |      | 15.907         | 5908058 | 96.05  | 573870 |

## References

1. Youziel, J.; Akhbar, A. R.; Aziz, Q.; Smith, M. E.; Caddick, S.; Tinker, A.; Baker, J. R. Bromo- and thiomaleimides as a new class of thiol-mediated fluorescence 'turn-on' reagents. *Org. Biomol. Chem.* **2014**, *12*, 557-560.
2. Heltweg, B.; Dequiedt, F.; Marshall, B. L.; Brauch, C.; Yoshida, M.; Nishino, N.; Verdin, E.; Jung, M. Subtype selective substrates for histone deacetylases. *J. Med. Chem.* **2004**, *47*, 5235-5243.
3. Stefanucci, A.; Lei, W.; Hruby, V. J.; Macedonio, G.; Luisi, G.; Carradori, S.; Streicher, J. M.; Mollica, A. Fluorescent-labeled bioconjugates of the opioid peptides biphalin and DPDPE incorporating fluorescein-maleimide linkers. *Future Med. Chem.* **2017**, *9*, 859-869.
4. Cissé, L.; Tine, A.; Kaboré, L.; Saba, A. Mass Spectrometry study of coumarins: Correlation between charges of atoms and fragmentation processes. *Spectroscopy Letters* **2009**, *42*, 95-99.
